# Supplementary material for: Anchoring ZnIn2S4 nanosheets on ZSM-5 for boosting photocatalytic Cr(vi) reduction
Source: Royal Society of Chemistry journal article supplement (doi:10.1039/d2nj03829c), 2022-01-01
Supplement: d2nj03829c1.pdf [file d2nj03829c1.pdf]

## Supporting Information

### **Anchoring $\text{ZnIn}_2\text{S}_4$ nanosheets on ZSM-5 for boosting photocatalytic Cr(VI) reduction**

Duoying Wang, Yuming Xie, Chengyuan Duan, Yi Feng\* and Jianfeng Yao\*

Jiangsu Co-Innovation Center of Efficient Processing and Utilization of Forest Resources, College of Chemical Engineering, Nanjing Forestry University, Nanjing 210037, China

\*Corresponding authors: [fengyi@njfu.edu.cn](mailto:fengyi@njfu.edu.cn) (YF); [jfyao@njfu.edu.cn](mailto:jfyao@njfu.edu.cn) (JY)

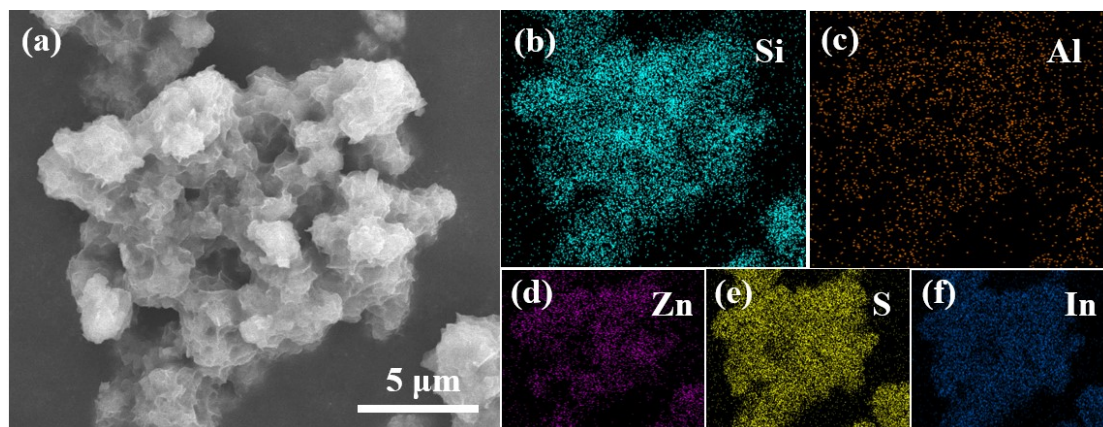

**Fig. S1** (a) SEM image of Z5@ZIS-100 and corresponding elemental mapping images of (b) Si, (c) Al, (d) Zn, (e) S and (f) In.

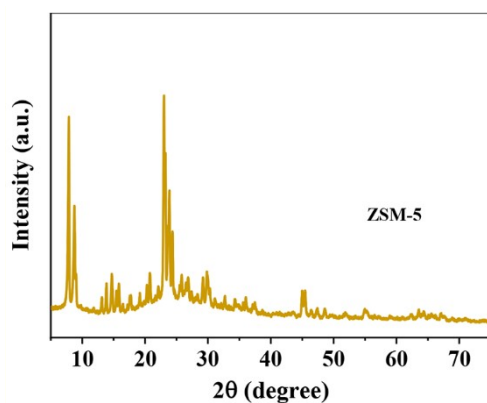

**Fig. S2** XRD patterns of ZSM-5

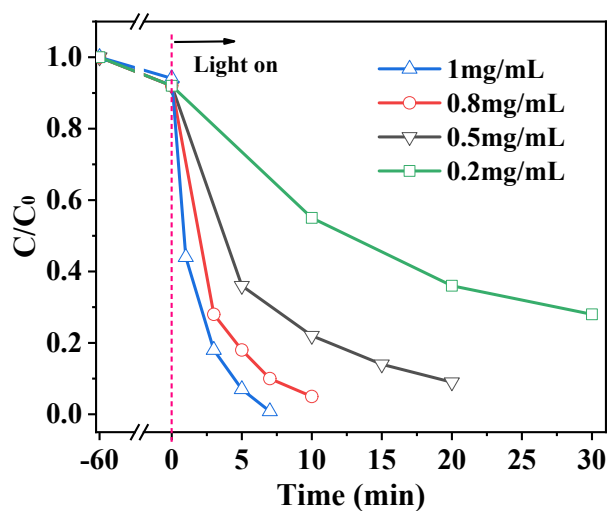

**Fig. S3** The catalytic Cr(VI) reduction performances over Z5@ZIS-100 with different catalyst loadings

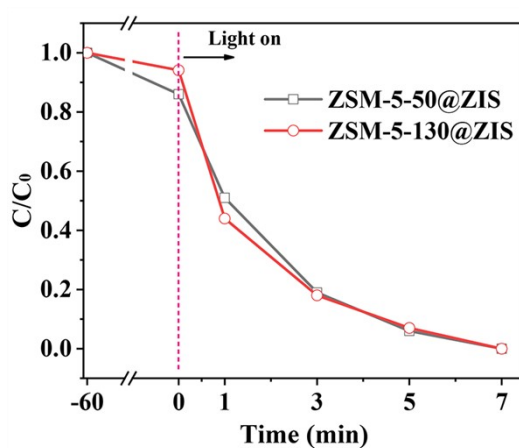

**Fig. S4** Photocatalytic performance of ZSM-5-x@ZIS composite for Cr(VI) reduction with the initial Cr(VI) concentration of 30 mg/L (x indicates for the Si/Al ratio of ZSM-5 used for the construction of ZSM-5@ZIS composite).

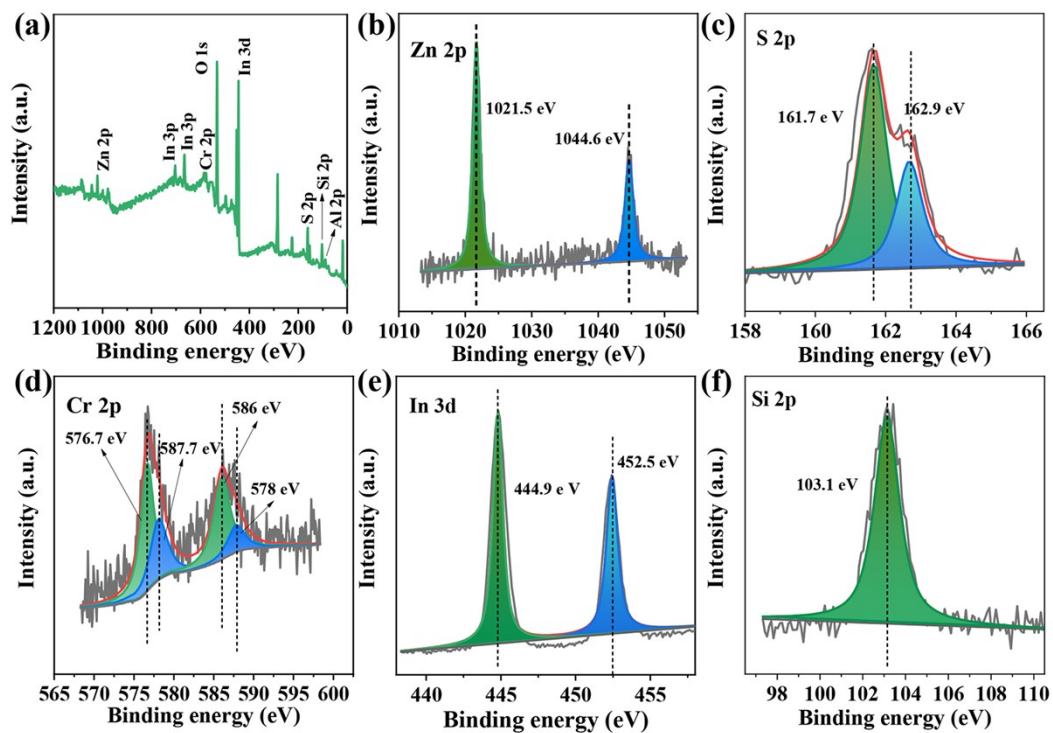

**Fig. S5** XPS spectra of recycled Z5@ZIS-100: (a) survey scan spectra and high-resolution XPS spectra of (b) Zn 2p, (c) S 2p, (d) Cr 2p, (e) In 3d, and (f) Si 2p.

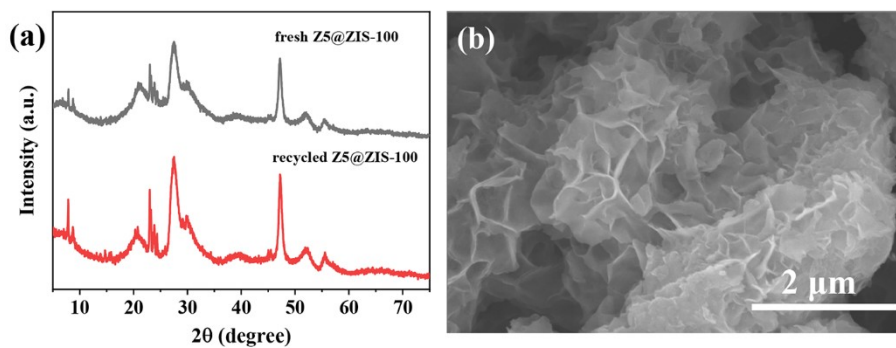

**Fig. S6** (a) XRD patterns of fresh Z5@ZIS-100 and recycled Z5@ZIS-100. (b) SEM image of recycled Z5@ZIS-100.

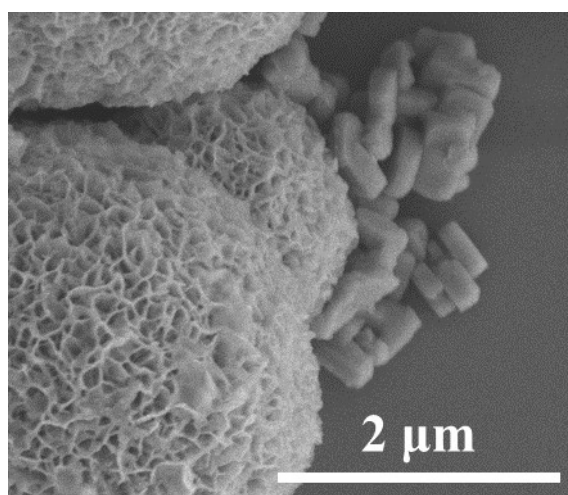

**Fig. S7** SEM image of m-Z5@ZIS-100

**Table S1.** pH value change of Cr(VI) solution before and after catalyst additions

| Catalyst         | pH  |
|------------------|-----|
| without catalyst | 5.0 |
| Z5@ZIS-50        | 4.9 |
| Z5@ZIS-100       | 4.9 |
| Z5@ZIS-150       | 4.8 |
| Z5@ZIS-200       | 4.8 |
| ZIS              | 4.8 |
